# Supplementary material for: Silicon/nickel oxide core/shell nanospheres as a hole transport layer for high efficiency and light-stable perovskite solar cells
Source: Royal Society of Chemistry journal article supplement (doi:10.1039/d3cp00678f), 2023-01-01
Supplement: d3cp00678f1.pdf [file d3cp00678f1.pdf]

## Supporting Information

### **Silicon/Nickel oxide core/shell nanospheres as hole transport layer for high efficiency and light stable perovskite solar cells**

Jifeng Zhai<sup>a</sup>, Xin Yin<sup>a</sup>, Jie Xiong<sup>a,\*</sup>, Pingfan Du<sup>a</sup>, Wei-Hsiang Chen<sup>b</sup>, Lixin Song<sup>a,\*</sup>

*a. College of Materials and Textiles, Zhejiang Sci-Tech University, Hangzhou, 310018, China*

*b. School of Science, Huzhou University, Huzhou, 313000, Zhejiang, China*

\*Corresponding authors. Tel: +86 571 86843603, E-mail address: [lxsong12@zstu.edu.cn](mailto:lxsong12@zstu.edu.cn);

[jxiong@zstu.edu.cn](mailto:jxiong@zstu.edu.cn).

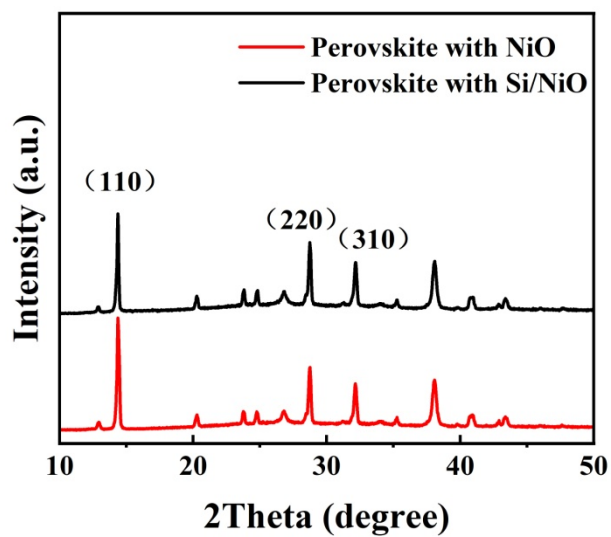

**Fig. S1** XRD patterns of perovskite film based on NiO and Si/NiO HTLs.

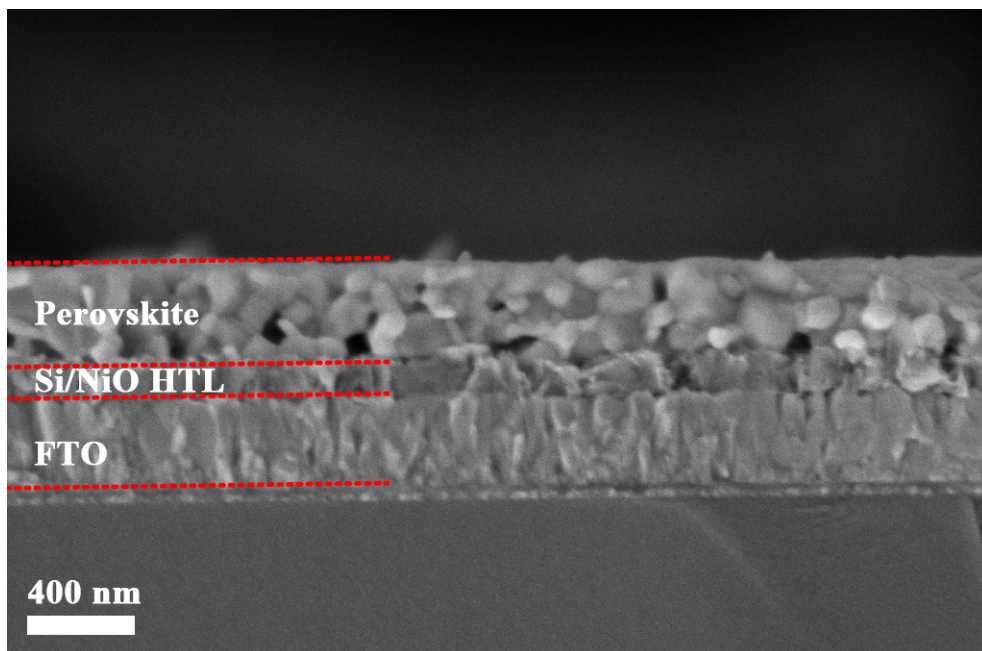

**Fig. S2** Cross-section SEM image of perovskite solar cell.

**Table. S1** The photovoltaic parameters of PSC devices.

| Device | $J_{sc}$ (mA/cm <sup>2</sup> ) | Voc(V)          | FF(%)         | PCE(%)           |
|--------|--------------------------------|-----------------|---------------|------------------|
| NiO    | $21.71 \pm 0.18$               | $1.08 \pm 0.01$ | $74 \pm 0.01$ | $17.61 \pm 0.26$ |
| Si/NiO | $22.09 \pm 0.16$               | $1.10 \pm 0.01$ | $78 \pm 0.01$ | $18.54 \pm 0.32$ |
